# Supplementary material for: Mathematical model and dynamic computer simulation on free flow zone electrophoresis
Source: Royal Society of Chemistry journal article supplement (doi:10.1039/c3an00834g), 2013-01-01
Supplement: c3an00834g.pdf [file c3an00834g.pdf]

## Supporting Information

# Mathematical model and dynamic computer simulation on free flow zone electrophoresis

Jie Zhang,<sup>a,†</sup> Jian Yan,<sup>a,b,†</sup> Si Li,<sup>a</sup> Bo Pang,<sup>a</sup> Cheng-Gang Guo,<sup>a</sup> Cheng-Xi Cao,<sup>a,\*1</sup> Xin-Qiao Jin<sup>b</sup>

<sup>a</sup>Laboratory of Bioseparation and Analytical Biochemistry, State Key Laboratory of Microbial Metabolism, School of Life Science and Biotechnology, Shanghai Jiao Tong University, Shanghai 200240, China

<sup>b</sup>Institute of Refrigeration and Cryogenics, School of Mechanical Engineering, Shanghai Jiao Tong University, Shanghai 200240, China

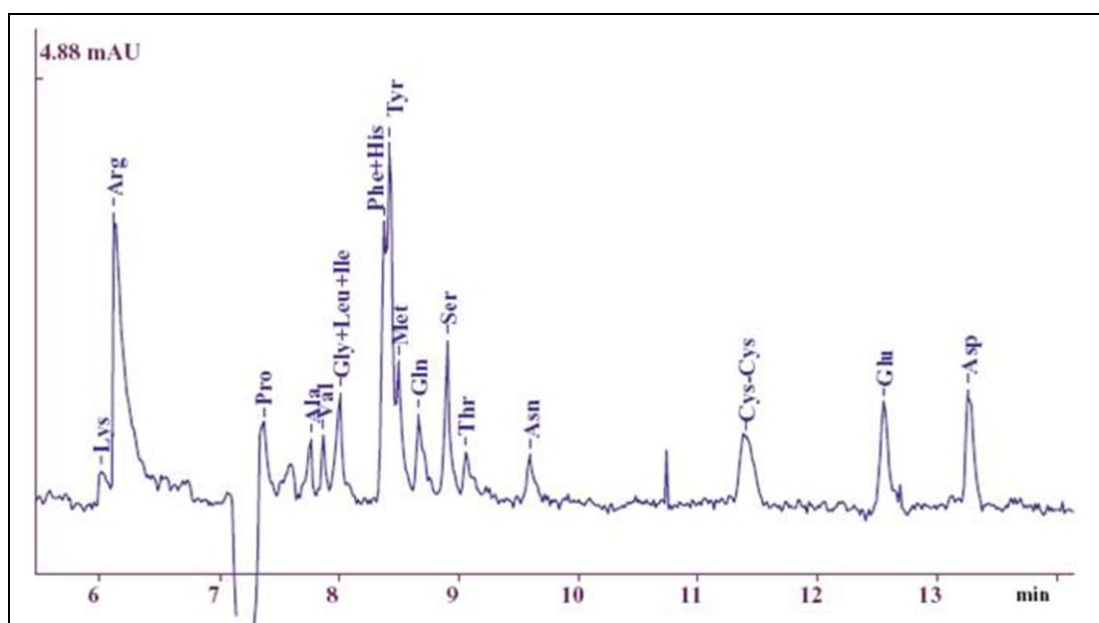

**Fig. S1.** Experimental electropherogram cited from reference. BGE: borate,  $c = 10$  mM,  $\text{pH} = 9.18$ . Capillary length: 75 cm Effective capillary length: 65 cm. Voltage: 20 kV. Hydrodynamic injection: 15 s at 3000 pa. Temperature:  $20^{\circ}\text{C}$ . UV detection at 190 nm. The figure was cited from Ref. [33] for the review.

<sup>†</sup> The first two authors have equal contributions to the paper.

<sup>\*</sup> The correspondent author: Prof. Cheng-Xi Cao, School of Life Science and Biotechnology, Shanghai Jiao Tong University, Shanghai 200240, China; Fax: +86 21-3420 5820; E-mail: cxcao@sjtu.edu.cn.

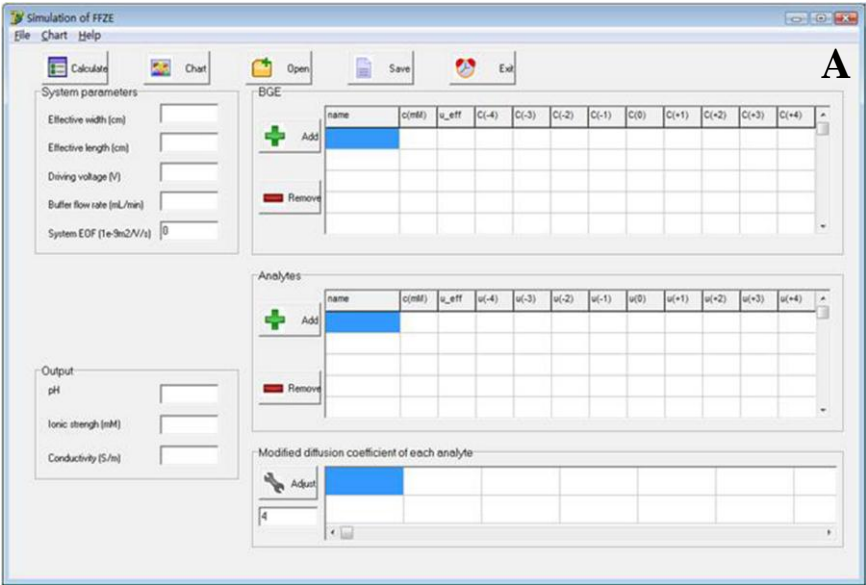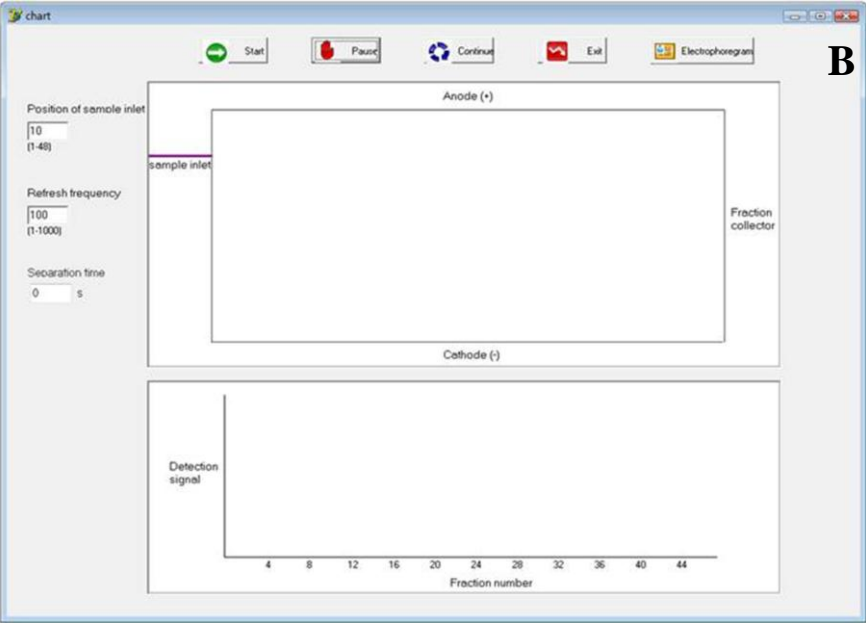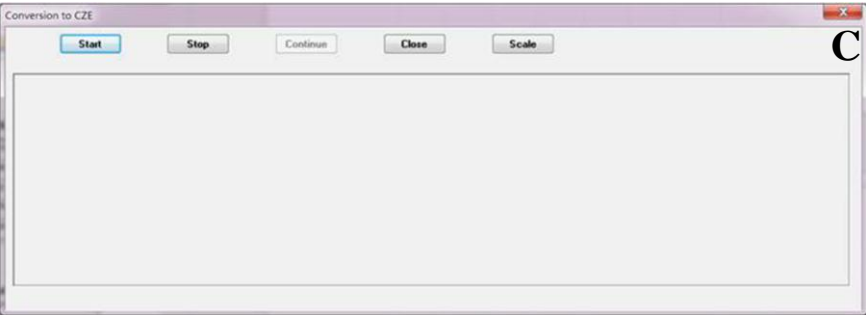

**Fig. S2.** Main window of simulation software for parameter input and output (A), simulating window for the dynamic separation process (the upper column) and electropherogram (the bottom column) of FFZE, and (B), and conversion window from FFZE to CZE (C).
